# Supplementary material for: Coastal proximity and visits are associated with better health but may not buffer health inequalities
Source: Springer Nature journal article supplement (doi:10.1038/s43247-023-00818-1), 2023-05-24
Supplement: MOESM3 [file 43247_2023_818_MOESM3_ESM.pdf]

## Coastal proximity and visits are associated with better health but may not buffer health inequalities

Geiger, Sandra J.; White, Mathew P.; Davison, Sophie M. C.; Zhang, Lei; McMeel, Oonagh; Kellett, Paula; Fleming, Lora E.

DOI:

[10.1038/s43247-023-00818-1](https://doi.org/10.1038/s43247-023-00818-1)

License:

Creative Commons: Attribution (CC BY)

### Document Version

Publisher's PDF, also known as Version of record

### Citation for published version (Harvard):

Geiger, SJ, White, MP, Davison, SMC, Zhang, L, McMeel, O, Kellett, P & Fleming, LE 2023, 'Coastal proximity and visits are associated with better health but may not buffer health inequalities', *Communications Earth and Environment*, vol. 4, no. 1, 166. <https://doi.org/10.1038/s43247-023-00818-1>

[Link to publication on Research at Birmingham portal](#)

### General rights

Unless a licence is specified above, all rights (including copyright and moral rights) in this document are retained by the authors and/or the copyright holders. The express permission of the copyright holder must be obtained for any use of this material other than for purposes permitted by law.

- Users may freely distribute the URL that is used to identify this publication.
- Users may download and/or print one copy of the publication from the University of Birmingham research portal for the purpose of private study or non-commercial research.
- User may use extracts from the document in line with the concept of 'fair dealing' under the Copyright, Designs and Patents Act 1988 (?)
- Users may not further distribute the material nor use it for the purposes of commercial gain.

Where a licence is displayed above, please note the terms and conditions of the licence govern your use of this document.

When citing, please reference the published version.

### Take down policy

While the University of Birmingham exercises care and attention in making items available there are rare occasions when an item has been uploaded in error or has been deemed to be commercially or otherwise sensitive.

If you believe that this is the case for this document, please contact [UBIRA@lists.bham.ac.uk](mailto:UBIRA@lists.bham.ac.uk) providing details and we will remove access to the work immediately and investigate.

## Supplementary Information:

### Coastal proximity and visits are associated with better health but may not buffer health inequalities

Sandra J. Geiger, Mathew P. White, Sophie M. C. Davison, Lei Zhang,  
Oonagh McMeel, Paula Kellett, & Lora E. Fleming

#### Table of Contents

|                                                                                                                                                                      |    |
|----------------------------------------------------------------------------------------------------------------------------------------------------------------------|----|
| Supplementary Notes 1: Search Terms for all Databases .....                                                                                                          | 2  |
| Supplementary Notes 2: Descriptive Statistics .....                                                                                                                  | 3  |
| Supplementary Notes 3: Model Comparison Based on the Leave-one out Cross-Validation Information Criterion (LOOIC) .....                                              | 6  |
| Supplementary Notes 4: Results of the Sensitivity Analyses .....                                                                                                     | 7  |
| Supplementary Notes 5: Overview of Measures in the SOPHIE and SOPHIA Surveys .....                                                                                   | 8  |
| Supplementary Notes 6: Flow Diagrams of Data Exclusions for Each Hypothesis.....                                                                                     | 10 |
| Supplementary Notes 7: Deviations from Preregistration.....                                                                                                          | 11 |
| Supplementary Notes 8: Standard Cut-off Criteria for the Bayes Factor Including Their Interpretation .....                                                           | 12 |
| Supplementary Notes 9: The Buffering Effect of Home Coastal Proximity and Visits on the Relationship Between Household Income and Self-Reported General Health ..... | 13 |
| References .....                                                                                                                                                     | 15 |

**Supplementary Notes 1:  
Search Terms for all Databases**

**Table 1.1****Search Terms Adapted for Scopus (Elsevier) Using Boolean Operators**

| Search                                                       | Search Term                                                                                                                                                                                                                                                                                         |
|--------------------------------------------------------------|-----------------------------------------------------------------------------------------------------------------------------------------------------------------------------------------------------------------------------------------------------------------------------------------------------|
| Relationship of nature contact and health                    | TITLE-ABS-KEY ((coast* OR "marine environment*") AND (visit* OR proximity OR distance) AND health*) AND (LIMIT-TO (LANGUAGE, "English") OR LIMIT-TO (LANGUAGE, "French") OR LIMIT-TO (LANGUAGE, "Dutch") OR LIMIT-TO (LANGUAGE, "German"))                                                          |
| Buffering effect of nature contact between income and health | TITLE-ABS-KEY ((natur* OR green?space* OR coast* OR "marine environment*") AND (income OR "socio?economic" AND status OR ses OR equigenesis OR equigenetic)) AND (LIMIT-TO (LANGUAGE, "English") OR LIMIT-TO (LANGUAGE, "French") OR LIMIT-TO (LANGUAGE, "German") OR LIMIT-TO (LANGUAGE, "Dutch")) |

**Table 1.2****Search Terms Adapted for CINAHL and PsycINFO (EBSCO) Using Boolean Operators**

| Search                                                       | Search Term                                                                                                                                                                                                                                                                 |
|--------------------------------------------------------------|-----------------------------------------------------------------------------------------------------------------------------------------------------------------------------------------------------------------------------------------------------------------------------|
| Relationship of nature contact and health                    | ((“coast*” OR “marine environment*”) AND (“visit*” OR “proximity” OR “distance”) AND (“health*”) AND LA (“English” OR “German” OR “French” OR “Dutch”))                                                                                                                     |
| Buffering effect of nature contact between income and health | ((“natur*” OR “greenspace*” OR “green space*” OR “green-space*” OR “coast*” OR “marine environment*”) AND (“income” OR “socio-economic status” OR “socioeconomic status” OR “ses” OR “equigenesis” OR “equicenetic”) AND LA (“English” OR “German” OR “French” OR “Dutch”)) |

**Table 1.3****Search Terms Adapted for Google Scholar**

| Search                                                       | Search Term                                                                                                |
|--------------------------------------------------------------|------------------------------------------------------------------------------------------------------------|
| Relationship of nature contact and health                    | (coast "marine environment") (visit proximity distance) (health)                                           |
| Buffering effect of nature contact between income and health | (natur greenspace coast "marine environment") (income "socio-economic status" ses equigenesis equicenetic) |

**Supplementary Notes 2:  
Descriptive Statistics**

**Table 2.1  
Unweighted Sample Size, Age, Sex, Household Income, Home Coastal Proximity, Coastal Visits, and Health per Country**

| Country   | N     | Age (in years)<br>M (SD) | Sex (% female) | Household income (in quintiles)                                                 | Home proximity (% per category)                                                                                                                               | Coastal visits (% per category)                                                                                                | Health (% per category)                                                                        |
|-----------|-------|--------------------------|----------------|---------------------------------------------------------------------------------|---------------------------------------------------------------------------------------------------------------------------------------------------------------|--------------------------------------------------------------------------------------------------------------------------------|------------------------------------------------------------------------------------------------|
| Australia | 1,012 | 48.66 (16.81)            | 51.4%          | Q1: 7.4%<br>Q2: 18.1%<br>Q3: 16.1%<br>Q4: 24.0%<br>Q5: 21.9%<br>Missing: 12.5%  | > 1 km: 12.4%<br>1-2 km: 5.7%<br>2-5 km: 9.0%<br>5-10 km: 14.6%<br>10-20 km: 16.4%<br>20-50 km: 18.6%<br>50-100 km: 9.0%<br>> 100 km: 10.0%<br>Missing: 4.4%  | 1x/week: 18.3%<br>2-3x/week: 14.9%<br>1x/month: 12.5%<br>2-3x/month: 18.7%<br>1-2x/year: 29.5%<br>Never: 5.0%<br>Missing: 1.0% | Very good: 18.5%<br>Good: 46.0%<br>Fair: 26.4%<br>Bad: 5.8%<br>Very bad: 2.4%<br>Missing: 0.9% |
| Belgium   | 1,001 | 46.53 (16.27)            | 50.8%          | Q1: 15.5%<br>Q2: 18.0%<br>Q3: 20.3%<br>Q4: 16.3%<br>Q5: 10.8%<br>Missing: 19.2% | > 1 km: 2.2%<br>1-2 km: 0.8%<br>2-5 km: 1.1%<br>5-10 km: 1.5%<br>10-20 km: 2.3%<br>20-50 km: 7.2%<br>50-100 km: 24.9%<br>> 100 km: 57.3%<br>Missing: 2.7%     | 1x/week: 3.3%<br>2-3x/week: 4.4%<br>1x/month: 5.6%<br>2-3x/month: 13.9%<br>1-2x/year: 56.5%<br>Never: 14.9%<br>Missing: 1.4%   | Very good: 10.7%<br>Good: 47.3%<br>Fair: 29.8%<br>Bad: 9.2%<br>Very bad: 2.0%<br>Missing: 1.1% |
| Bulgaria  | 1,004 | 44.83 (14.31)            | 50.9%          | Q1: 4.8%<br>Q2: 3.2%<br>Q3: 5.7%<br>Q4: 14.6%<br>Q5: 64.0%<br>Missing: 7.7%     | > 1 km: 5.9%<br>1-2 km: 3.8%<br>2-5 km: 3.4%<br>5-10 km: 1.7%<br>10-20 km: 0.8%<br>20-50 km: 2.2%<br>50-100 km: 7.9%<br>> 100 km: 73.4%<br>Missing: 1.0%      | 1x/week: 11.9%<br>2-3x/week: 5.5%<br>1x/month: 4.6%<br>2-3x/month: 13.1%<br>1-2x/year: 59.3%<br>Never: 3.5%<br>Missing: 2.2%   | Very good: 22.9%<br>Good: 46.9%<br>Fair: 26.0%<br>Bad: 2.7%<br>Very bad: 0.4%<br>Missing: 1.1% |
| Czechia   | 1,006 | 46.64 (15.89)            | 51.3%          | Q1: 8.0%<br>Q2: 7.3%<br>Q3: 10.5%<br>Q4: 10.6%<br>Q5: 46.4%<br>Missing: 17.2%   | > 1 km: 0.3%<br>1-2 km: 0.3%<br>2-5 km: 0.1%<br>5-10 km: 0.4%<br>10-20 km: 0.5%<br>20-50 km: 0.1%<br>50-100 km: 0.5%<br>> 100 km: 89.9%<br>Missing: 8.0%      | 1x/week: 0.7%<br>2-3x/week: 0.8%<br>1x/month: 0.9%<br>2-3x/month: 1.9%<br>1-2x/year: 61.1%<br>Never: 29.1%<br>Missing: 5.5%    | Very good: 16.0%<br>Good: 43.4%<br>Fair: 30.4%<br>Bad: 7.6%<br>Very bad: 1.6%<br>Missing: 1.0% |
| France    | 1,024 | 47.92 (16.27)            | 51.9%          | Q1: 22.9%<br>Q2: 20.3%<br>Q3: 19.7%<br>Q4: 18.3%<br>Q5: 9.0%<br>Missing: 9.8%   | > 1 km: 4.6%<br>1-2 km: 1.7%<br>2-5 km: 3.3%<br>5-10 km: 3.3%<br>10-20 km: 4.2%<br>20-50 km: 9.4%<br>50-100 km: 11.6%<br>> 100 km: 58.4%<br>Missing: 3.5%     | 1x/week: 10.2%<br>2-3x/week: 5.9%<br>1x/month: 7.4%<br>2-3x/month: 16.2%<br>1-2x/year: 45.8%<br>Never: 13.3%<br>Missing: 1.3%  | Very good: 9.7%<br>Good: 40.7%<br>Fair: 35.9%<br>Bad: 9.9%<br>Very bad: 2.3%<br>Missing: 1.5%  |
| Germany   | 1,017 | 48.48 (15.77)            | 51.3%          | Q1: 18.8%<br>Q2: 13.6%<br>Q3: 17.4%<br>Q4: 18.5%<br>Q5: 15.9%<br>Missing: 15.8% | > 1 km: 1.4%<br>1-2 km: 1.0%<br>2-5 km: 0.9%<br>5-10 km: 1.0%<br>10-20 km: 1.3%<br>20-50 km: 2.9%<br>50-100 km: 7.1%<br>> 100 km: 80.8%<br>Missing: 3.7%      | 1x/week: 2.5%<br>2-3x/week: 2.6%<br>1x/month: 3.2%<br>2-3x/month: 8.1%<br>1-2x/year: 53.1%<br>Never: 28.6%<br>Missing: 2.0%    | Very good: 9.4%<br>Good: 38.5%<br>Fair: 38.2%<br>Bad: 10.3%<br>Very bad: 1.7%<br>Missing: 1.8% |
| Greece    | 1,013 | 42.10 (13.33)            | 49.2%          | Q1: 24.8%<br>Q2: 24.5%<br>Q3: 19.0%<br>Q4: 15.3%<br>Q5: 6.0%<br>Missing: 10.5%  | > 1 km: 19.2%<br>1-2 km: 11.3%<br>2-5 km: 14.9%<br>5-10 km: 15.7%<br>10-20 km: 13.9%<br>20-50 km: 13.1%<br>50-100 km: 6.7%<br>> 100 km: 3.8%<br>Missing: 1.5% | 1x/week: 43.3%<br>2-3x/week: 23.8%<br>1x/month: 11.1%<br>2-3x/month: 12.9%<br>1-2x/year: 8.0%<br>Never: 0.5%<br>Missing: 0.4%  | Very good: 36.7%<br>Good: 48.9%<br>Fair: 12.0%<br>Bad: 1.2%<br>Very bad: 1.0%<br>Missing: 0.2% |
| Ireland   | 1,000 | 44.69 (15.62)            | 50.4%          | Q1: 11.3%<br>Q2: 22.3%<br>Q3: 17.8%<br>Q4: 19.5%                                | > 1 km: 14.8%<br>1-2 km: 8.1%<br>2-5 km: 10.7%<br>5-10 km: 13.0%                                                                                              | 1x/week: 21.3%<br>2-3x/week: 16.3%<br>1x/month: 15.5%                                                                          | Very good: 24.8%<br>Good: 45.6%<br>Fair: 23.0%<br>Bad: 4.2%                                    |

|                |               |                          |              |                                                                                              |                                                                                                                                                              |                                                                                                                                |                                                                                                            |
|----------------|---------------|--------------------------|--------------|----------------------------------------------------------------------------------------------|--------------------------------------------------------------------------------------------------------------------------------------------------------------|--------------------------------------------------------------------------------------------------------------------------------|------------------------------------------------------------------------------------------------------------|
|                |               |                          |              | Q5: 15.8%<br>Missing: 13.3%                                                                  | 10-20 km: 14.6%<br>20-50 km: 17.1%<br>50-100 km: 13.9%<br>> 100 km: 3.4%<br>Missing: 4.4%                                                                    | 2-3x/month: 19.4%<br>1-2x/year: 25.7%<br>Never: 1.5%<br>Missing: 0.3%                                                          | Very bad: 1.5%<br>Missing: 0.9%                                                                            |
| Italy          | 1,020         | 47.97<br>(15.57)         | 52.5%        | Q1: 18.7%<br>Q2: 14.5%<br>Q3: 23.4%<br>Q4: 17.7%<br>Q5: 10.2%<br>Missing: 15.4%              | > 1 km: 11.5%<br>1-2 km: 3.5%<br>2-5 km: 7.0%<br>5-10 km: 8.2%<br>10-20 km: 9.5%<br>20-50 km: 15.9%<br>50-100 km: 13.6%<br>> 100 km: 27.8%<br>Missing: 2.9%  | 1x/week: 22.3%<br>2-3x/week: 12.9%<br>1x/month: 10.6%<br>2-3x/month: 16.9%<br>1-2x/year: 31.3%<br>Never: 3.6%<br>Missing: 2.5% | Very good: 10.2%<br>Good: 49.5%<br>Fair: 35.2%<br>Bad: 3.2%<br>Very bad: 0.8%<br>Missing: 1.1%             |
| Netherlands    | 1,001         | 47.76<br>(17.15)         | 52.0%        | Q1: 13.1%<br>Q2: 12.4%<br>Q3: 18.8%<br>Q4: 19.7%<br>Q5: 18.4%<br>Missing: 17.7%              | > 1 km: 3.1%<br>1-2 km: 2.4%<br>2-5 km: 5.2%<br>5-10 km: 6.6%<br>10-20 km: 9.4%<br>20-50 km: 22.2%<br>50-100 km: 19.5%<br>> 100 km: 27.5%<br>Missing: 4.2%   | 1x/week: 5.8%<br>2-3x/week: 8.1%<br>1x/month: 12.7%<br>2-3x/month: 18.8%<br>1-2x/year: 39.6%<br>Never: 13.0%<br>Missing: 2.1%  | Very good: 8.4%<br>Good: 51.4%<br>Fair: 31.1%<br>Bad: 6.8%<br>Very bad: 0.6%<br>Missing: 1.7%              |
| Norway         | 1,019         | 45.99<br>(16.17)         | 51.7%        | Q1: 19.8%<br>Q2: 18.4%<br>Q3: 17.3%<br>Q4: 12.9%<br>Q5: 12.9%<br>Missing: 18.8%              | > 1 km: 32.7%<br>1-2 km: 11.0%<br>2-5 km: 16.3%<br>5-10 km: 12.3%<br>10-20 km: 7.5%<br>20-50 km: 6.7%<br>50-100 km: 4.0%<br>> 100 km: 6.4%<br>Missing: 3.2%  | 1x/week: 29.5%<br>2-3x/week: 16.0%<br>1x/month: 14.6%<br>2-3x/month: 16.6%<br>1-2x/year: 15.7%<br>Never: 3.0%<br>Missing: 4.5% | Very good: 18.7%<br>Good: 45.3%<br>Fair: 25.4%<br>Bad: 7.8%<br>Very bad: 1.0%<br>Missing: 1.8%             |
| Poland         | 1,003         | 44.16<br>(15.24)         | 51.9%        | Q1: 9.4%<br>Q2: 11.3%<br>Q3: 15.8%<br>Q4: 23.2%<br>Q5: 33.3%<br>Missing: 7.1%                | > 1 km: 1.0%<br>1-2 km: 1.6%<br>2-5 km: 2.9%<br>5-10 km: 3.0%<br>10-20 km: 2.5%<br>20-50 km: 3.0%<br>50-100 km: 8.0%<br>> 100 km: 75.5%<br>Missing: 2.6%     | 1x/week: 6.1%<br>2-3x/week: 6.2%<br>1x/month: 6.0%<br>2-3x/month: 11.2%<br>1-2x/year: 59.3%<br>Never: 8.9%<br>Missing: 2.4%    | Very good: 15.0%<br>Good: 50.3%<br>Fair: 27.0%<br>Bad: 6.6%<br>Very bad: 0.6%<br>Missing: 0.5%             |
| Portugal       | 1,000         | 43.58<br>(14.56)         | 49.7%        | Q1: 10.9%<br>Q2: 12.6%<br>Q3: 19.0%<br>Q4: 23.5%<br>Q5: 23.0%<br>Missing: 11.0%              | > 1 km: 10.5%<br>1-2 km: 5.4%<br>2-5 km: 12.3%<br>5-10 km: 17.6%<br>10-20 km: 19.2%<br>20-50 km: 19.6%<br>50-100 km: 8.3%<br>> 100 km: 6.0%<br>Missing: 1.1% | 1x/week: 32.0%<br>2-3x/week: 21.4%<br>1x/month: 17.2%<br>2-3x/month: 15.4%<br>1-2x/year: 10.8%<br>Never: 1.0%<br>Missing: 2.2% | Very good: 9.9%<br>Good: 55.3%<br>Fair: 30.6%<br>Bad: 2.8%<br>Very bad: 0.9%<br>Missing: 0.5%              |
| Spain          | 1,025         | 45.76<br>(15.12)         | 50.7%        | Q1: 14.2%<br>Q2: 16.4%<br>Q3: 20.6%<br>Q4: 16.7%<br>Q5: 19.9%<br>Missing: 12.2%              | > 1 km: 14.5%<br>1-2 km: 7.5%<br>2-5 km: 9.3%<br>5-10 km: 6.5%<br>10-20 km: 5.9%<br>20-50 km: 8.5%<br>50-100 km: 8.1%<br>> 100 km: 38.4%<br>Missing: 1.3%    | 1x/week: 21.5%<br>2-3x/week: 14.4%<br>1x/month: 9.7%<br>2-3x/month: 15.1%<br>1-2x/year: 31.7%<br>Never: 3.0%<br>Missing: 4.6%  | Very good: 12.6%<br>Good: 44.0%<br>Fair: 34.0%<br>Bad: 7.2%<br>Very bad: 1.6%<br>Missing: 0.7%             |
| United Kingdom | 1,034         | 47.86<br>(16.86)         | 53.8%        | Q1: 13.1%<br>Q2: 10.3%<br>Q3: 19.1%<br>Q4: 18.3%<br>Q5: 21.9%<br>Missing: 17.5%              | > 1 km: 10.4%<br>1-2 km: 2.9%<br>2-5 km: 5.8%<br>5-10 km: 5.0%<br>10-20 km: 9.1%<br>20-50 km: 16.1%<br>50-100 km: 23.2%<br>> 100 km: 22.6%<br>Missing: 4.8%  | 1x/week: 13.2%<br>2-3x/week: 6.8%<br>1x/month: 7.6%<br>2-3x/month: 21.1%<br>1-2x/year: 42.6%<br>Never: 7.5%<br>Missing: 1.3%   | Very good: 21.1%<br>Good: 46.1%<br>Fair: 22.1%<br>Bad: 6.7%<br>Very bad: 2.2%<br>Missing: 1.8%             |
| <b>Total</b>   | <b>15,179</b> | <b>46.20<br/>(15.81)</b> | <b>51.3%</b> | <b>Q1: 14.2%<br/>Q2: 14.9%<br/>Q3: 17.4%<br/>Q4: 17.9%<br/>Q5: 21.9%,<br/>Missing: 13.7%</b> | <b>&gt; 1 km: 9.7%<br/>1-2 km: 4.5%<br/>2-5 km: 6.8%<br/>5-10 km: 7.4%<br/>10-20 km: 7.8%<br/>20-50 km: 10.8%<br/>50-100 km: 11.1%</b>                       | <b>1x/week: 16.1%<br/>2-3x/week: 10.7%<br/>1x/month: 9.3%<br/>2-3x/month: 14.6%<br/>1-2x/year: 38.0%<br/>Never: 9.1%</b>       | <b>Very good: 16.3%<br/>Good: 46.6%<br/>Fair: 28.5%<br/>Bad: 6.1%<br/>Very bad: 1.4%<br/>Missing: 1.1%</b> |

|  |  |  |  |  |                                  |               |  |
|--|--|--|--|--|----------------------------------|---------------|--|
|  |  |  |  |  | > 100 km: 38.7%<br>Missing: 3.3% | Missing: 2.2% |  |
|--|--|--|--|--|----------------------------------|---------------|--|

*Note.* Q1: lowest income quintile, Q5: highest income quintile. In the survey, respondents were presented with ten income ranges that matched the income deciles in their specific country at the time of sampling. These deciles were collapsed into five ‘quintiles’ (e.g., deciles 1 and 2 were collapsed into quintile 1) and reflect levels of relative income within each country rather than five equally sized groups within our sample. These quintiles do not have equal proportions of respondents because (a) samples were not stratified on household income and (b) substantial numbers of respondents (13.7%) preferred not to answer this question.

**Table 2.2**  
**Weighted Descriptive Statistics for Self-Reported General Health Depending on Home Coastal Proximity (n = 13,620; excluding Czechia)**

|                      | Home Coastal Proximity |        |        |         |          |          |           |          |
|----------------------|------------------------|--------|--------|---------|----------|----------|-----------|----------|
|                      | < 1 km                 | 1-2 km | 2-5 km | 5-10 km | 10-20 km | 20-50 km | 50-100 km | > 100 km |
| Very good health     | 22.3%                  | 19.0%  | 18.4%  | 20.9%   | 15.8%    | 15.9%    | 16.2%     | 13.2%    |
| Good health          | 46.2%                  | 48.7%  | 46.6%  | 48.2%   | 50.9%    | 48.8%    | 49.5%     | 45.9%    |
| Fair health          | 24.7%                  | 25.1%  | 28.1%  | 25.2%   | 27.4%    | 29.0%    | 26.3%     | 32.5%    |
| Bad health           | 5.4%                   | 4.6%   | 5.6%   | 4.6%    | 4.7%     | 5.2%     | 6.4%      | 7.2%     |
| Very bad health      | 1.4%                   | 2.5%   | 1.3%   | 1.1%    | 1.3%     | 1.1%     | 1.7%      | 1.3%     |
| Total n <sup>a</sup> | 1,477                  | 680    | 1,034  | 1,085   | 1,131    | 1,617    | 1,666     | 4,931    |

*Note.* <sup>a</sup>Rounded to integers.

**Table 2.3**  
**Weighted Descriptive Statistics for Self-Reported General Health Depending on Coastal Visits (n = 14,702)**

|                      | Coastal Visits              |                           |                |                            |                        |         |
|----------------------|-----------------------------|---------------------------|----------------|----------------------------|------------------------|---------|
|                      | 1 Once a week or more often | 2 Once every 2 or 3 weeks | 3 Once a month | 4 Once every 2 or 3 months | 5 Once or twice a year | 6 Never |
| Very good health     | 23.8%                       | 20.0%                     | 16.8%          | 16.9%                      | 14.1%                  | 8.0%    |
| Good health          | 47.6%                       | 48.8%                     | 52.8%          | 49.2%                      | 47.2%                  | 36.0%   |
| Fair health          | 22.7%                       | 26.7%                     | 24.2%          | 27.9%                      | 30.9%                  | 39.9%   |
| Bad health           | 4.2%                        | 3.5%                      | 5.0%           | 5.0%                       | 6.6%                   | 13.3%   |
| Very bad health      | 1.6%                        | 0.9%                      | 1.2%           | 1.0%                       | 1.3%                   | 2.9%    |
| Total n <sup>a</sup> | 2,458                       | 1,594                     | 1,402          | 2,175                      | 5,710                  | 1,363   |

*Note.* <sup>a</sup>Rounded to integers.

**Table 2.4**  
**Unweighted Descriptive Statistics for Household Income Depending on Home Coastal Proximity (n = 11,916)**

|                                           | Home Coastal Proximity |        |        |         |          |          |           |          |
|-------------------------------------------|------------------------|--------|--------|---------|----------|----------|-----------|----------|
|                                           | < 1 km                 | 1-2 km | 2-5 km | 5-10 km | 10-20 km | 20-50 km | 50-100 km | > 100 km |
| 1 <sup>st</sup> income quintile (lowest)  | 248                    | 94     | 177    | 150     | 157      | 219      | 242       | 683      |
| 2 <sup>nd</sup> income quintile           | 249                    | 121    | 174    | 168     | 198      | 269      | 260       | 659      |
| 3 <sup>rd</sup> income quintile           | 253                    | 129    | 188    | 229     | 213      | 325      | 272       | 857      |
| 4 <sup>th</sup> income quintile           | 260                    | 116    | 181    | 211     | 242      | 317      | 344       | 903      |
| 5 <sup>th</sup> income quintile (highest) | 250                    | 134    | 176    | 201     | 221      | 264      | 324       | 1,238    |

**Table 2.5**  
**Unweighted Descriptive Statistics for Household Income Depending on Coastal Visits (n = 12,790)**

|                                           | Coastal Visits              |                           |                |                            |                        |         |
|-------------------------------------------|-----------------------------|---------------------------|----------------|----------------------------|------------------------|---------|
|                                           | 1 Once a week or more often | 2 Once every 2 or 3 weeks | 3 Once a month | 4 Once every 2 or 3 months | 5 Once or twice a year | 6 Never |
| 1 <sup>st</sup> income quintile (lowest)  | 373                         | 204                       | 191            | 297                        | 695                    | 320     |
| 2 <sup>nd</sup> income quintile           | 403                         | 250                       | 229            | 307                        | 767                    | 235     |
| 3 <sup>rd</sup> income quintile           | 424                         | 318                       | 260            | 399                        | 975                    | 211     |
| 4 <sup>th</sup> income quintile           | 459                         | 350                       | 271            | 400                        | 1,038                  | 162     |
| 5 <sup>th</sup> income quintile (highest) | 500                         | 305                       | 276            | 513                        | 1,440                  | 218     |

**Supplementary Notes 3:  
Model Comparison Based on the Leave-one out Cross-Validation Information Criterion (LOOIC)**

| Predictor                           | Model          | Model Description                                                                                       | LOOIC            | SE            | ΔLOOIC   | ΔSE      |
|-------------------------------------|----------------|---------------------------------------------------------------------------------------------------------|------------------|---------------|----------|----------|
| Proximity (Hypothesis 1)            | Model 1        | Categorical predictor, random intercept                                                                 | 32,399.13        | 192.84        | 0.60     | 8.17     |
|                                     | Model 2        | Categorical predictor, random intercept and slope                                                       | 32,405.74        | 192.16        | 7.21     | 11.19    |
|                                     | Model 3        | Monotonic predictor, random intercept                                                                   | 32,400.41        | 193.80        | 1.88     | 4.24     |
|                                     | <b>Model 4</b> | <b>Monotonic predictor, random intercept and slope</b>                                                  | <b>32,398.53</b> | <b>193.76</b> | <b>0</b> | <b>0</b> |
| Visits (Hypothesis 2)               | Model 1        | Categorical predictor, random intercept                                                                 | 34,962.24        | 200.64        | 21.05    | 10.20    |
|                                     | Model 2        | Categorical predictor, random intercept and slope                                                       | 34,945.75        | 201.12        | 4.56     | 8.56     |
|                                     | Model 3        | Monotonic predictor, random intercept                                                                   | 34,960.21        | 200.50        | 19.03    | 10.17    |
|                                     | <b>Model 4</b> | <b>Monotonic predictor, random intercept and slope</b>                                                  | <b>34,941.19</b> | <b>201.39</b> | <b>0</b> | <b>0</b> |
| Proximity and Income (Hypothesis 3) | Model 1        | Categorical income, random intercept, random slope proximity                                            | 28,364.91        | 183.45        | 30.43    | 13.20    |
|                                     | Model 2        | Categorical income, random intercept, random slope proximity and categorical income                     | 28,362.10        | 184.24        | 27.62    | 6.99     |
|                                     | Model 3        | Categorical income, random intercept, random slope proximity and categorical income, random interaction | 38,366.98        | 184.08        | 32.50    | 7.89     |
|                                     | Model 4        | Monotonic income, random intercept, random slope proximity                                              | 28,361.40        | 183.13        | 26.92    | 12.96    |
|                                     | <b>Model 5</b> | <b>Monotonic income, random intercept, random slope proximity and monotonic income</b>                  | <b>28,334.48</b> | <b>184.68</b> | <b>0</b> | <b>0</b> |
|                                     | Model 6        | Monotonic income, random intercept, random slope proximity and monotonic income, random interaction     | 28,336.12        | 184.65        | 1.64     | 1.08     |
| Visits and Income (Hypothesis 4)    | Model 1        | Categorical income, random intercept, random slope visits                                               | 30,445.73        | 190.63        | 27.42    | 12.44    |
|                                     | Model 2        | Categorical income, random intercept, random slope visits and categorical income                        | 30,442.66        | 190.93        | 24.35    | 7.39     |
|                                     | Model 3        | Categorical income, random intercept, random slope visits and categorical income, random interaction    | 30,445.61        | 190.72        | 27.30    | 8.91     |
|                                     | Model 4        | Monotonic income, random intercept, random slope visits                                                 | 30,442.00        | 190.20        | 23.69    | 12.18    |
|                                     | <b>Model 5</b> | <b>Monotonic income, random intercept, random slope visits and monotonic income</b>                     | <b>30,418.31</b> | <b>191.54</b> | <b>0</b> | <b>0</b> |
|                                     | Model 6        | Monotonic income, random intercept, random slope visits and monotonic income, random interaction        | 30,419.35        | 191.20        | 1.04     | 2.17     |

*Note.* LOOIC = leave-one-out cross-validation information criterion (lower means better). SE = standard error. Bold indicates the model with the best predictive abilities, with the delta values referenced to this best model.

**Supplementary Notes 4:  
Results of the Sensitivity Analyses**

| Hypothesis                                                                   | Confirmatory results                                                                            | Results of sensitivity analysis with Normal(0, 5)                                               | Results sensitive/ insensitive to prior choice? | Results of sensitivity analysis that excluded speeders <sup>a</sup>                                         | Results sensitive/ insensitive to exclusion of speeders? | Results of sensitivity analysis that include Czech data             | Results sensitive/ insensitive to inclusion of Czech data?                 | Results of sensitivity analysis with additional covariates <sup>b</sup>                         | Results sensitive/ insensitive to inclusion of additional covariates?      |
|------------------------------------------------------------------------------|-------------------------------------------------------------------------------------------------|-------------------------------------------------------------------------------------------------|-------------------------------------------------|-------------------------------------------------------------------------------------------------------------|----------------------------------------------------------|---------------------------------------------------------------------|----------------------------------------------------------------------------|-------------------------------------------------------------------------------------------------|----------------------------------------------------------------------------|
| <b>Hypothesis 1:</b> proximity and health (Model 4)                          | BF <sub>+</sub> = 82.33, b = 0.02, SE = 0.01, 90% CrI [0.01, 0.03]                              | BF <sub>+</sub> = 92.02, b = 0.02, SE = 0.01, 90% CrI [0.00, 0.03]                              | Insensitive                                     | BF <sub>+</sub> = 81.19, b = 0.02, SE = 0.01, 90% CrI [0.00, 0.03], n = 13,329                              | Insensitive                                              | BF <sub>+</sub> = 126.66, b = 0.02, SE = 0.01, 90% CrI [0.01, 0.03] | Insensitive (but changed the value and classification of the Bayes Factor) | BF <sub>+</sub> = 199.00, b = 0.02, SE = 0.00, 90% CrI [0.01, 0.03], n = 11,632                 | Insensitive (but changed the value and classification of the Bayes Factor) |
| <b>Hypothesis 2:</b> visits and health (Model 4)                             | BF <sub>+</sub> → ∞, b = 0.11, SE = 0.02, 90% CrI [0.08, 0.13]                                  | BF <sub>+</sub> → ∞, b = 0.11, SE = 0.02, 90% CrI [0.08, 0.13]                                  | Insensitive                                     | BF <sub>+</sub> → ∞, b = 0.11, SE = 0.02, 90% CrI [0.08, 0.13], n = 14,392                                  | Insensitive                                              |                                                                     |                                                                            | BF <sub>+</sub> → ∞, b = 0.11, SE = 0.02, 90% CrI [0.08, 0.14], n = 12,485                      | Insensitive                                                                |
| <b>Hypothesis 3:</b> interaction of proximity and income on health (Model 5) | BF <sub>+</sub> = 39.68, b = 0.01, SE = 0.00, 90% CrI [0.00, 0.01]                              | BF <sub>+</sub> = 41.40, b = 0.01, SE = 0.00, 90% CrI [0.00, 0.01]                              | Insensitive                                     | BF <sub>+</sub> = 71.29, b = 0.01, SE = 0.00, 90% CrI [0.00, 0.02], n = 11,653                              | Insensitive                                              | BF <sub>+</sub> = 54.05, b = 0.01, SE = 0.00, 90% CrI [0.00, 0.01]  | Insensitive                                                                | BF <sub>+</sub> = 11.21, b = 0.00, SE = 0.00, 90% CrI [0.00, 0.01]                              | Insensitive (but changed the value and classification of the Bayes Factor) |
| <b>Hypothesis 4:</b> interaction of visits and income on health (Model 5)    | BF <sub>+</sub> = 1.08, b = 0.00, SE = 0.00, 90% CrI [-0.01, 0.01], BF <sub>01</sub> = 2,348.96 | BF <sub>+</sub> = 1.09, b = 0.00, SE = 0.00, 90% CrI [-0.01, 0.01], BF <sub>01</sub> = 1,163.51 | Insensitive<br>Two-sided testing: insensitive   | BF <sub>+</sub> = 1.06, b = 0.00, SE = 0.00, 90% CrI [-0.01, 0.01], BF <sub>01</sub> = 2,268.72, n = 12,514 | Insensitive<br>Two-sided testing: insensitive            |                                                                     |                                                                            | BF <sub>+</sub> = 2.11, b = 0.00, SE = 0.01, 90% CrI [-0.01, 0.01], BF <sub>01</sub> = 1,815.68 | Insensitive<br>Two-sided testing: insensitive                              |

Note. <sup>a</sup>Speeders are defined as respondents who completed the survey faster than 5 min. Individuals with a missing completion time (i.e., all Australian respondents) were not excluded.

<sup>b</sup>Additional covariates were education, work status, and political orientation.



**Supplementary Notes 5:  
Overview of Measures in the SOPHIE and SOPHIA Surveys**

**Table 5.1  
Overview of the Items in Both Surveys**

| SOPHIE survey (Europe)                                                                                                                                                                                       | SOPHIA survey (Australia)                                                                                                                                                                                    |
|--------------------------------------------------------------------------------------------------------------------------------------------------------------------------------------------------------------|--------------------------------------------------------------------------------------------------------------------------------------------------------------------------------------------------------------|
|                                                                                                                                                                                                              | Region                                                                                                                                                                                                       |
|                                                                                                                                                                                                              | Marine connectedness                                                                                                                                                                                         |
| Home coastal proximity                                                                                                                                                                                       | Home coastal proximity                                                                                                                                                                                       |
| Professions associated with marine environment                                                                                                                                                               | Professions associated with marine environment                                                                                                                                                               |
| Frequency visiting the coast in the past 12 months                                                                                                                                                           | Frequency visiting the coast in the past 12 months                                                                                                                                                           |
| Sea/ coast recreational activities                                                                                                                                                                           | Sea/ coast recreational activities                                                                                                                                                                           |
|                                                                                                                                                                                                              | Frequency of eating seafood in the past 12 months                                                                                                                                                            |
| Risks/ benefits of marine activities to the economy                                                                                                                                                          | Risks/ benefits of marine activities to the economy                                                                                                                                                          |
| Risks/ benefits of marine activities to the environment                                                                                                                                                      | Risks/ benefits of marine activities to the environment                                                                                                                                                      |
| Risks/ benefits of marine activities to public health and well-being                                                                                                                                         | Risks/ benefits of marine activities to public health and well-being                                                                                                                                         |
| Policy intervention to protect public health                                                                                                                                                                 | Policy intervention to protect public health                                                                                                                                                                 |
| Importance of goals (economic growth for marine businesses, protecting marine environment, protecting and promoting public health and well-being through protecting the marine environment) for policymakers | Importance of goals (economic growth for marine businesses, protecting marine environment, protecting and promoting public health and well-being through protecting the marine environment) for policymakers |
| Importance of goals (economic growth for marine businesses, protecting marine environment, protecting and promoting public health and well-being through protecting the marine environment) for individual   | Importance of goals (economic growth for marine businesses, protecting marine environment, protecting and promoting public health and well-being through protecting the marine environment) for individual   |
| Concerns about threats to public health and well-being                                                                                                                                                       | Concerns about threats to public health and well-being                                                                                                                                                       |
|                                                                                                                                                                                                              | Ease/difficulty to reduce risk by members of public                                                                                                                                                          |
| Support for research funding to understand health and well-being implications                                                                                                                                | Support for research funding to understand health and well-being implications                                                                                                                                |
| Key priorities for public health and marine protection                                                                                                                                                       |                                                                                                                                                                                                              |
| General health                                                                                                                                                                                               | General health                                                                                                                                                                                               |
|                                                                                                                                                                                                              | Evaluative well-being/life satisfaction                                                                                                                                                                      |
| Big-5 personality                                                                                                                                                                                            | Big-5 personality                                                                                                                                                                                            |
| Highest education level                                                                                                                                                                                      | Highest education level                                                                                                                                                                                      |
| Current employment status                                                                                                                                                                                    | Current employment status                                                                                                                                                                                    |
|                                                                                                                                                                                                              | Number of adults in household                                                                                                                                                                                |
|                                                                                                                                                                                                              | Number of children in household                                                                                                                                                                              |
| Political orientation                                                                                                                                                                                        | Political affiliation                                                                                                                                                                                        |
| Annual household income                                                                                                                                                                                      | Annual household income                                                                                                                                                                                      |

**Table 5.2  
Overview of Income Categories per Country**

| Country   | Income Categories                         |                                                        |                                                        |                                                        |                                                        |                                                          |                                                            |                                                            |                                                              |                                                    |
|-----------|-------------------------------------------|--------------------------------------------------------|--------------------------------------------------------|--------------------------------------------------------|--------------------------------------------------------|----------------------------------------------------------|------------------------------------------------------------|------------------------------------------------------------|--------------------------------------------------------------|----------------------------------------------------|
|           | 1                                         | 2                                                      | 3                                                      | 4                                                      | 5                                                      | 6                                                        | 7                                                          | 8                                                          | 9                                                            | 10                                                 |
| Australia | Up to \$9,999 year (Up to \$189 per week) | \$10,000 to \$19,999 per year (\$190 - \$379 per week) | \$20,000 to \$29,999 per year (\$380 - \$579 per week) | \$30,000 to \$39,999 per year (\$580 - \$769 per week) | \$40,000 to \$49,999 per year (\$770 - \$959 per week) | \$50,000 to \$59,999 per year (\$960 - \$1,149 per week) | \$60,000 to \$79,999 per year (\$1,150 - \$1,529 per week) | \$80,000 to \$99,999 per year (\$1,530 - \$1,919 per week) | \$100,000 to \$124,999 per year (\$1,920 - \$2,399 per week) | \$125,000 or more per year (Over \$2,400 per week) |
| Belgium   | Up to €13,390                             | €13,390 to €16,850                                     | €16,850 to €20,650                                     | €20,650 to €25,210                                     | €25,210 to €30,260                                     | €30,260 to €36,700                                       | €36,700 to €44,870                                         | €44,870 to €54,330                                         | €54,330 to €67,000                                           | More than €67,000                                  |
| Bulgaria  | Up to 400 лв                              | 401 лв to 450 лв                                       | 451 лв to 500 лв                                       | 501 лв to 550 лв                                       | 551 лв to 650 лв                                       | 651 лв to 700 лв                                         | 701 лв to 830 лв                                           | 831 лв to 1,000 лв                                         | 1001 лв to 1,200 лв                                          | 1,201 лв to 1,700 and more                         |
| Czechia   | Up to 11,899 Kč                           | 11,900 to 15,299 Kč                                    | 15,300 to 19,899 Kč                                    | 19,900 to 23,499 Kč                                    | 23,500 to 27,299 Kč                                    | 27,300 to 31,999 Kč                                      | 32,000 to 37,899 Kč                                        | 37,900 to 44,599 Kč                                        | 44,600 to 55,999 Kč                                          | More than 56,000 Kč                                |
| France    | Up to €13,550                             | €13,551 to €17,400                                     | €17,401 to €21,100                                     | €21,101 to €25,350                                     | €25,351 to €30,050                                     | €30,051 to €35,400                                       | €35,401 to €41,900                                         | €41,901 to €50,400                                         | €50,401 to €65,200                                           | More than €65,200                                  |
| Germany   | Up to €12,710                             | €12,711 to 17,290                                      | €17,291 to €21,460                                     | €21,461 to €25,660                                     | €25,661 to €30,280                                     | €30,281 to €35,500                                       | €35,501 to €41,650                                         | €41,651 to €49,780                                         | €49,781 to €63,050                                           | More than €63,050                                  |

|                |                         |                                   |                                   |                                   |                                   |                                   |                                   |                                   |                                    |                              |
|----------------|-------------------------|-----------------------------------|-----------------------------------|-----------------------------------|-----------------------------------|-----------------------------------|-----------------------------------|-----------------------------------|------------------------------------|------------------------------|
| Greece         | Up to<br>€575           | €576 to<br>€775                   | €776 to<br>€980                   | €981 to<br>€1,190                 | €1,191<br>to<br>€1,425            | €1,426<br>to<br>€1,700            | €1,701<br>to<br>€2,040            | €2,041<br>to<br>€2,500            | 2,501 to<br>3,230 €                | More than<br>€ 3,231         |
| Ireland        | Up to<br>€12,740        | €12,741<br>to<br>€18,720          | €18,721<br>to<br>€24,960          | €24,961<br>to<br>€30,680          | €30,681<br>to<br>€36,400          | €36,401<br>to<br>€42,640          | €42,641<br>to<br>€49,660          | €49,661<br>to<br>€61,360          | €61,361 to<br>€84,240              | More than<br>€84,240         |
| Italy          | Up to<br>€9,000         | €9,001<br>to<br>€13,500           | €13,501<br>to<br>€17,000          | €17,001<br>to<br>€20,500          | €20,501<br>to<br>€24,000          | €24,001<br>to<br>€29,000          | €29,001<br>to<br>€34,500          | €34,501<br>to<br>€42,500          | €42,501 to<br>€54,500              | More than<br>€54,500         |
| Netherlands    | Less<br>than<br>€13,200 | €13,200<br>to<br>€17,300          | €17,300<br>to<br>€20,800          | €20,800<br>to<br>€24,500          | €24,500<br>to<br>€28,700          | €28,700<br>to<br>€33,900          | €33,900<br>to<br>€40,100          | €40,100<br>to<br>€47,800          | €47,800 to<br>€60,100              | More than<br>€60,100         |
| Norway         | Up to<br>251,000<br>kr  | 251,001<br>kr to<br>356,000<br>kr | 356,001<br>kr to<br>448,000<br>kr | 448,001<br>kr to<br>537,000<br>kr | 537,001<br>kr to<br>634,000<br>kr | 634,001<br>kr to<br>729,000<br>kr | 729,001<br>kr to<br>830,000<br>kr | 830,001<br>kr to<br>955,000<br>kr | 955,001kr<br>to<br>1,162,000<br>kr | More than<br>1,162,000<br>kr |
| Poland         | Up to<br>16,800zł       | 16,801zł<br>to<br>22,800zł        | 22,801zł<br>to<br>28,800zł        | 28,801zł<br>to<br>34,800zł        | 34,801zł<br>to<br>40,800zł        | 40,801zł<br>to<br>48,000zł        | 48,001zł<br>to<br>56,400zł        | 56,401zł<br>to<br>67,200zł        | 67,201zł<br>to<br>85,200zł         | More than<br>85,200zł        |
| Portugal       | Up to<br>€4,960         | €4,961<br>to<br>€7,200            | €7,201<br>to<br>€9,200            | €9,201<br>to<br>€11,400           | €11,401<br>to<br>€13,900          | €13,901<br>to<br>€16,500          | €16,501<br>to<br>€19,700          | €19,701<br>to<br>€24,450          | €24,451 to<br>€37,000              | More than<br>€37,000         |
| Spain          | Up to<br>€9,350         | €9,351<br>to<br>€12,000           | €12,001<br>to<br>€15,000          | €15,001<br>to<br>€18,000          | €18,001<br>to<br>€21,600          | €21,601<br>to<br>€26,400          | €26,401<br>to<br>€30,000          | €30,001<br>to<br>€34,200          | €34,201 to<br>€44,400              | More than<br>€44,400         |
| United Kingdom | Up to<br>£11,440        | £11,441<br>to<br>£15,340          | £15,341<br>to<br>£19,032          | £19,033<br>to<br>£22,984          | £22,985<br>to<br>£27,404          | £27,405<br>to<br>£32,760          | £32,761<br>to<br>£39,052          | £39,053<br>to<br>£47,684          | £47,685 to<br>£63,128              | More than<br>£63,128         |

Note. There was a typo in the original German survey for income category 4. It stated €24,461 to €25,660, while it should have been €21,461 to €25,660. Individuals that earned between 21,461 and 24,460 may have indicated a different income or “don’t know” or skipped this item.

**Supplementary Notes 6:  
Flow Diagrams of Data Exclusions for Each Hypothesis**

**Figure 6.1**  
**Flow Diagram of Data Exclusions for Hypothesis 1 (Home Coastal Proximity) and 3 (Interaction of Home Coastal Proximity and Household Income)**

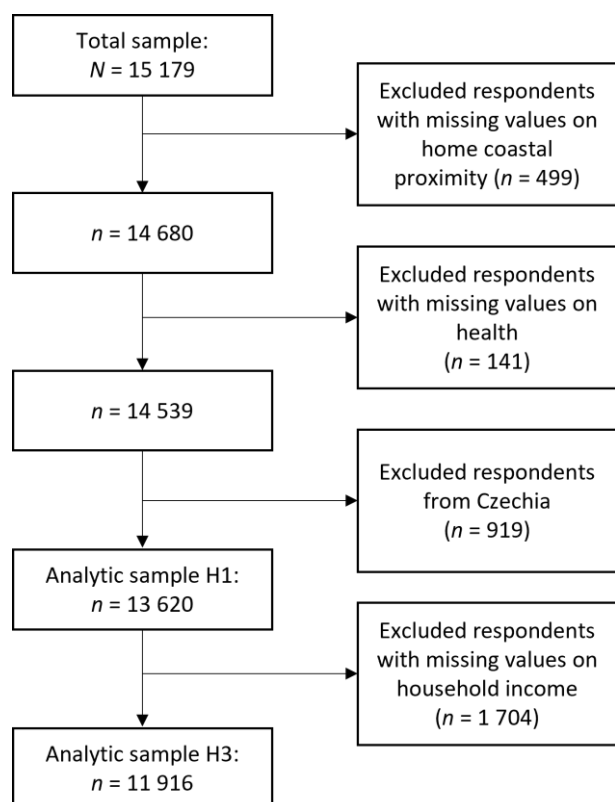

**Figure 6.2**  
**Flow Diagram of Data Exclusions for Hypothesis 2 (Coastal Visits) and 4 (Interaction of Coastal Visits and Household Income)**

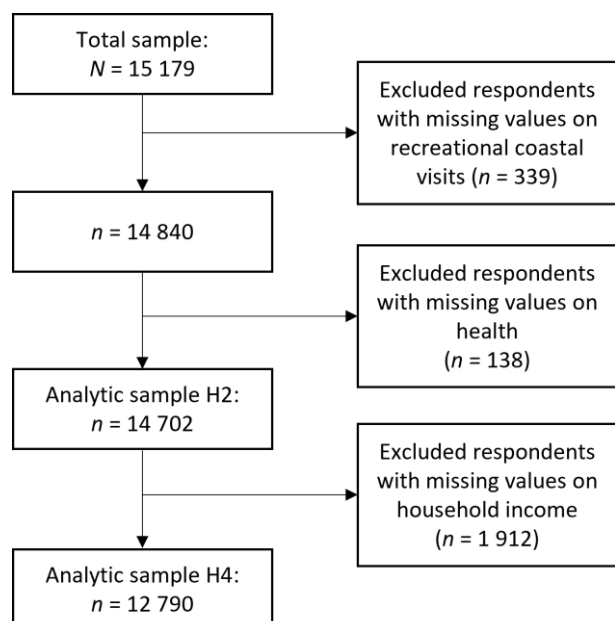

**Supplementary Notes 7:  
Deviations from Preregistration**

| <b>Section</b>              | <b>Preregistered</b>                                                                                                                                                                                                            | <b>Deviation</b>                                                                                                                                                                                                                                                                                                                                                                                                                                                                                                      | <b>Reason</b>                                                                                                                                                                          |
|-----------------------------|---------------------------------------------------------------------------------------------------------------------------------------------------------------------------------------------------------------------------------|-----------------------------------------------------------------------------------------------------------------------------------------------------------------------------------------------------------------------------------------------------------------------------------------------------------------------------------------------------------------------------------------------------------------------------------------------------------------------------------------------------------------------|----------------------------------------------------------------------------------------------------------------------------------------------------------------------------------------|
| <b>Reporting</b>            | We preregistered that we would report all results in two studies in a single manuscript.                                                                                                                                        | We split the results into marine protection (Paper 1) and health/well-being (Paper 2).                                                                                                                                                                                                                                                                                                                                                                                                                                | There were more key messages than expected, so we decided to have one clear message per paper.                                                                                         |
| <b>Analysis</b>             | We preregistered that all models would be fit with both proximity <b>and</b> visits as predictors:<br>Model 1: no random slope<br>Model 2: random slope proximity<br>Model 3: random slope visits<br>Model 4: random slope both | We fit all models with proximity <b>or</b> visits as a predictor:<br>Model 1: proximity, no random slope<br>Model 2: proximity, random slope proximity<br>Model 3: visits, no random slope<br>Model 4: visits, random slope visits                                                                                                                                                                                                                                                                                    | Multicollinearity between home home coastal proximity and visits.                                                                                                                      |
| <b>Analysis</b>             | We preregistered that we would fit a model with and without a random effect for the interaction and compare the fit based on the LOOIC.                                                                                         | We fit three models per interaction:<br>Model 1: random slope proximity, fixed slope income, and fixed interaction<br>Model 2: random slope proximity, random slope income, and fixed interaction<br>Model 3: random slope proximity, random slope income, and random interaction<br>Model 4: random slope visits, fixed slope income, and fixed interaction<br>Model 5: random slope visits, random slope income, and fixed interaction<br>Model 6: random slope visits, random slope income, and random interaction | We additionally wanted to test whether the slope of income varies across countries.                                                                                                    |
| <b>Analysis</b>             | We preregistered that we would fit the models for Hypothesis 1 and 3 (with home coastal proximity as a predictor) in all 15 countries.                                                                                          | We fit the models in 14 countries, excluding Czechia.                                                                                                                                                                                                                                                                                                                                                                                                                                                                 | Czechia is a landlocked country and had little variation in home coastal proximity. When excluding Czechia, the results did not substantially differ from those that included Czechia. |
| <b>Sensitivity Analysis</b> | We preregistered that we would conduct sensitivity analyses with a narrower prior, $\alpha, \beta \sim \text{Normal}(0, 5)$ , to check the robustness of the findings when choosing a different prior distribution.             | We additionally set a narrower prior on for the between-country variation $\sigma_{\text{country}} \sim \text{HalfCauchy}(0, 5)$ .                                                                                                                                                                                                                                                                                                                                                                                    | We did this to additionally test the effect of a narrower prior on the between-country variation.                                                                                      |

**Supplementary Notes 8:  
Standard Cut-off Criteria for the Bayes Factor Including Their Interpretation**

| <b>BF<sub>10</sub><br/>Evidence for H<sub>1</sub></b> | <b>Interpretation</b>                                                                               | <b>BF<sub>01</sub><br/>Evidence for H<sub>0</sub></b> | <b>Interpretation</b>                                                                                    |
|-------------------------------------------------------|-----------------------------------------------------------------------------------------------------|-------------------------------------------------------|----------------------------------------------------------------------------------------------------------|
| ≥ 100                                                 | The effect is <i>extremely</i> supported by the evidence.                                           | ≥ 100                                                 | The null effect is <i>extremely</i> supported by the evidence.                                           |
| 30 ≤ BF <sub>10</sub> < 100                           | The effect is <i>very strongly</i> supported by the evidence.                                       | 30 ≤ BF <sub>01</sub> < 100                           | The null effect is <i>very strongly</i> supported by the evidence.                                       |
| 10 ≤ BF <sub>10</sub> < 30                            | The effect is <i>strongly</i> supported by the evidence.                                            | 10 ≤ BF <sub>01</sub> < 30                            | The null effect is <i>strongly</i> supported by the evidence.                                            |
| 3 ≤ BF <sub>10</sub> < 10                             | The effect is <i>moderately</i> supported by the evidence.                                          | 3 ≤ BF <sub>01</sub> < 10                             | The null effect is <i>moderately</i> supported by the evidence.                                          |
| 1 < BF <sub>10</sub> < 3                              | The evidence is <i>insufficient</i> to make a decisive decision, although the effect likely exists. | 1 < BF <sub>01</sub> < 3                              | The evidence is <i>insufficient</i> to make a decisive decision, although the null effect likely exists. |
| 1                                                     | No evidence                                                                                         | 1                                                     | No evidence                                                                                              |

*Note.* Adapted from Lieberoth et al.<sup>1</sup>, and interpretation based on Jeffreys.<sup>2</sup>

**Supplementary Notes 9:  
The Buffering Effect of Home Coastal Proximity and Visits on the Relationship Between Household  
Income and Self-Reported General Health**

**Figure 9.1**  
**Marginal Effects of Household Income and Home Coastal Proximity on Self-Reported General Health**  
**(Treated as Ordinal)**

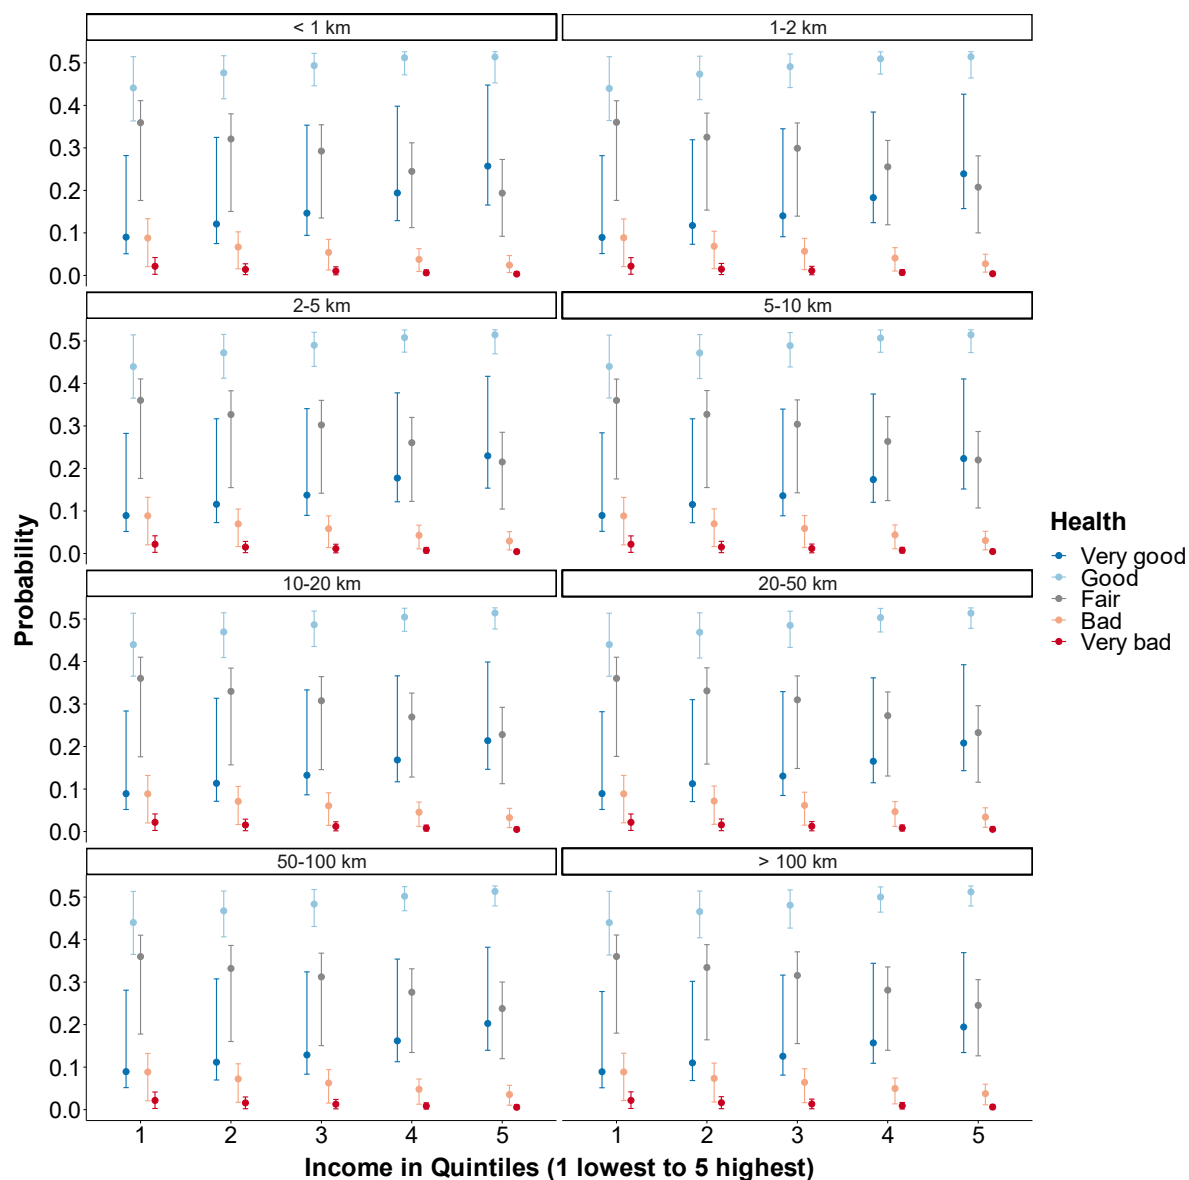

*Note.* Points represent the posterior mean of the probability of self-reported health from 1 'very good' to 5 'very bad' (indicated by the five colors and treated as ordinal) depending on both household income in quintiles (x-axis) and home coastal proximity (categories). Error bars indicate the 95% credible interval, including the random effects variation across countries.

**Figure 9.2**  
**Marginal Effects of Household Income and Visits on Self-Reported General Health (Treated as Ordinal)**

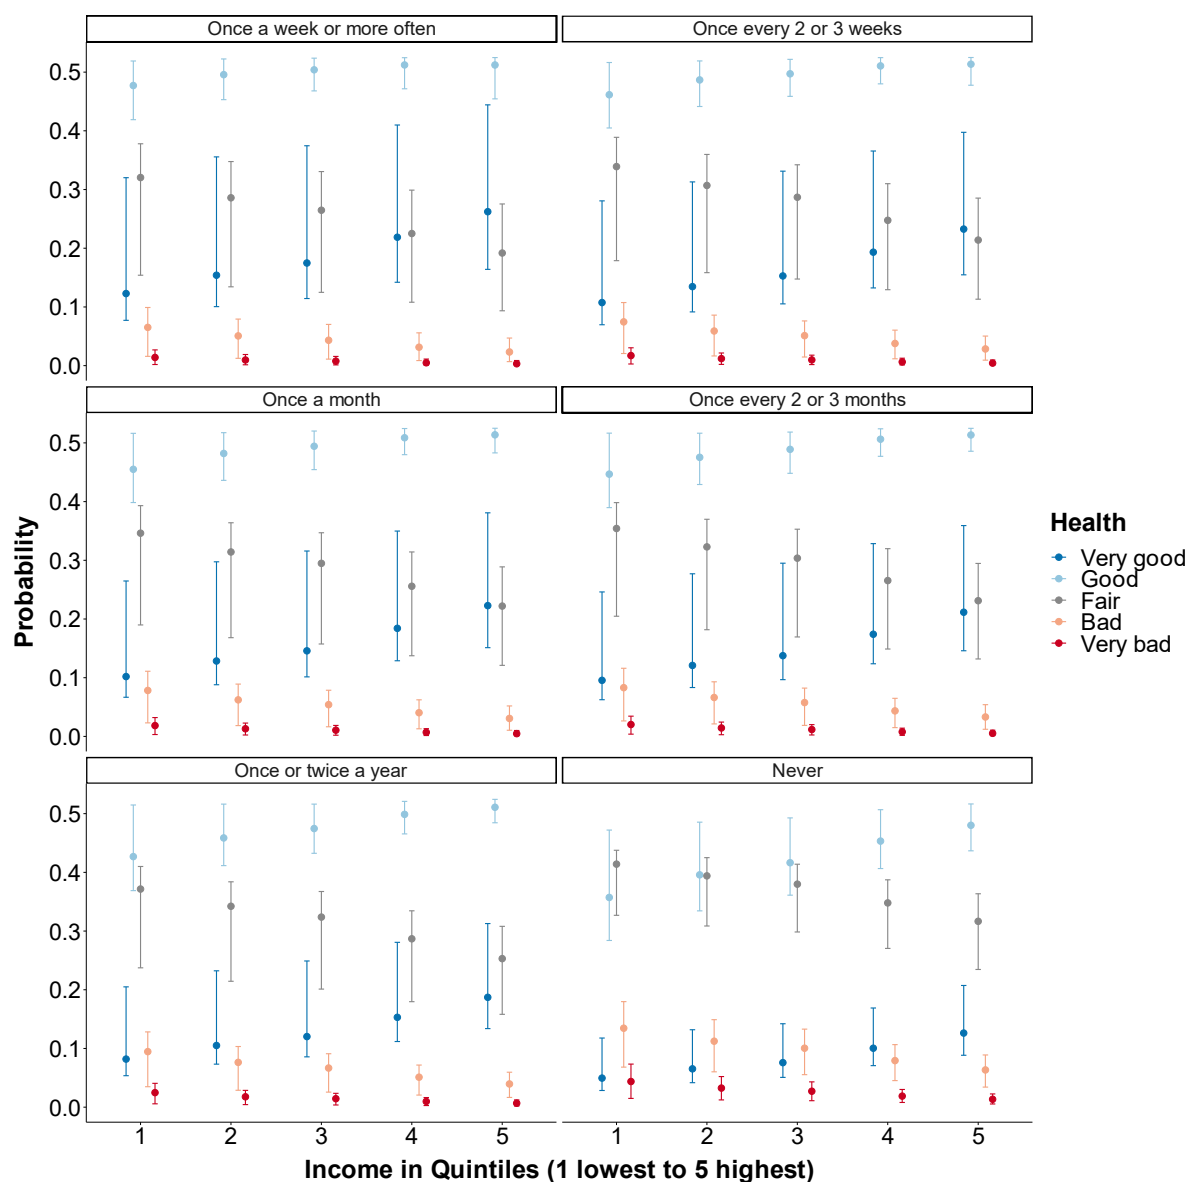

*Note.* Points represent the posterior mean of the probability of self-reported health from 1 'very good' to 5 'very bad' (indicated by the five colors and treated as ordinal) depending on both household income in quintiles (x-axis) and home coastal proximity (categories). Error bars indicate the 95% credible interval, including the random effects variation across countries.

### Supplementary References

1. Lieberoth A, Lin S-Y, Stöckli S, Han H, Kowal M, Gelpi R, et al. Stress and worry in the 2020 coronavirus pandemic: Relationships to trust and compliance with preventive measures across 48 countries in the COVIDiSTRESS global survey [Internet]. [cited 2022 Mar 29]. Available from: <https://doi.org/10.1098/rsos.200589>
2. Jeffreys H. Theory of probability. 3rd ed. Vol. 432. Oxford University Press; 1961.
